# Supplementary material for: Ultra-small mesoporous silica nanoparticles as efficient carriers for pH responsive releases of anti-cancer drugs
Source: Royal Society of Chemistry journal article supplement (doi:10.1039/c5dt03700j), 2015-01-01
Supplement: c5dt03700j1.pdf [file c5dt03700j1.pdf]

Electronic Supplementary Information (ESI) for Dalton Transactions

## **Ultra-small Mesoporous Silica Nanoparticle as an Efficient Carrier for pH Responsive Releases of Anti-cancer Drugs**

Haoquan Zheng\*, Cheuk-Wai Tai, Jie Su, Xiaodong Zou, Feifei Gao\*

*Berzelii Center EXSELENT on Porous Materials and Department of Materials and Environmental Chemistry, Stockholm University, Stockholm, SE-106 91, Sweden; E-mail: feifei.gao@mmk.su.se, haoquan.zheng@mmk.su.se*

### **SUPPORTING INFORMATION**

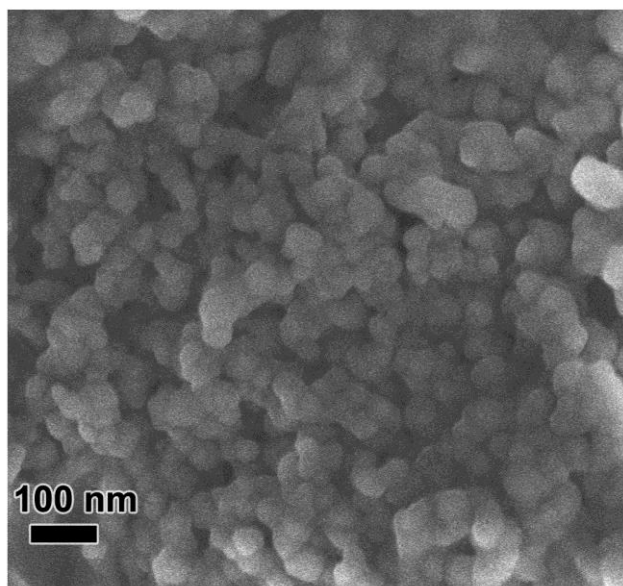

**Fig. S1.** SEM image of UMSN.

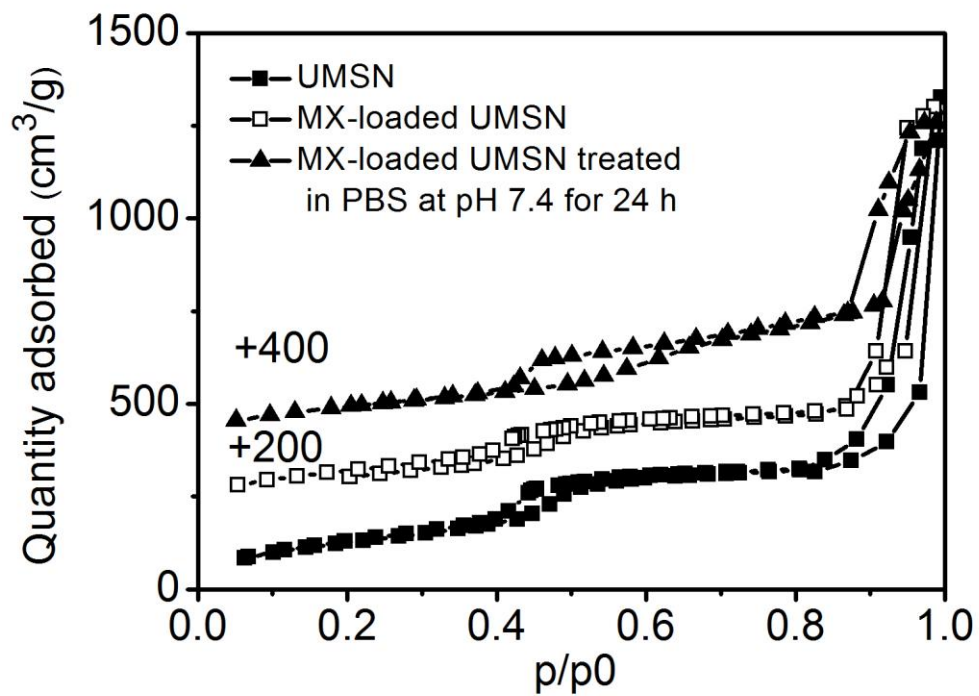

Fig. S2. N<sub>2</sub> adsorption/desorption isotherms.

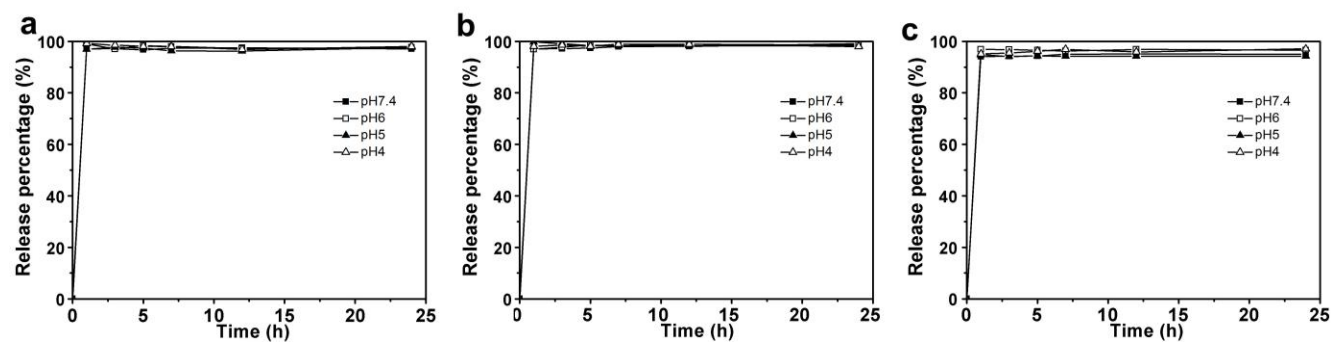

**Fig. S3.** The solubilization kinetic profiles of free MX (a), DOX (b) and MTX (c) at different pH values.

**Table S1** Porosity properties obtained from N<sub>2</sub> adsorption-desorption.

|                                                     | BET Surface area<br>(m <sup>2</sup> /g) <sup>a</sup> | Mesopore volume<br>(mm <sup>3</sup> /g) <sup>b</sup> | Pore size<br>(nm) <sup>c</sup> |
|-----------------------------------------------------|------------------------------------------------------|------------------------------------------------------|--------------------------------|
| UMSN                                                | 452                                                  | 0.71                                                 | 4.0                            |
| MX-loaded UMSN                                      | 333                                                  | 0.50                                                 | 3.9                            |
| MX-loaded UMSN treated in<br>PBS at pH 7.4 for 24 h | 414                                                  | 0.67                                                 | 4.3                            |

<sup>a</sup>Calculated by BET method; <sup>b</sup> Calculated by the adsorbed amount at relative pressure of ~ 0.8 ; <sup>c</sup>Determined by the BJH pore size distribution (based on adsorption branch of isotherms).

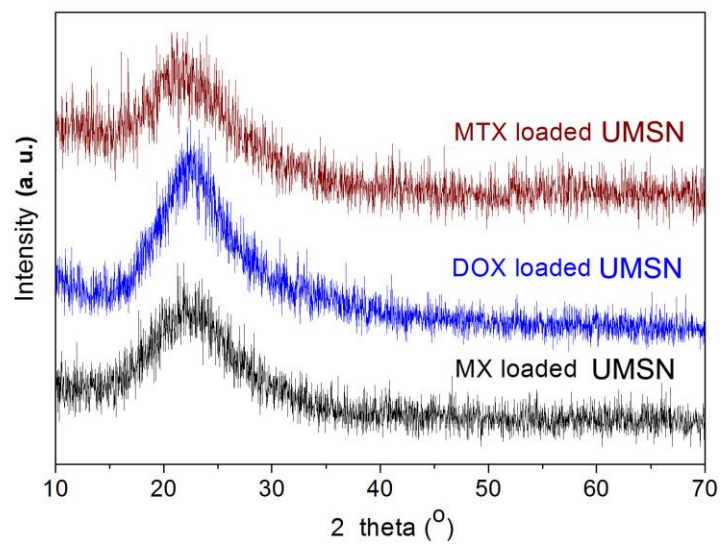

**Fig. S4.** Wide angle XRD patterns of drug-loaded UMSN.

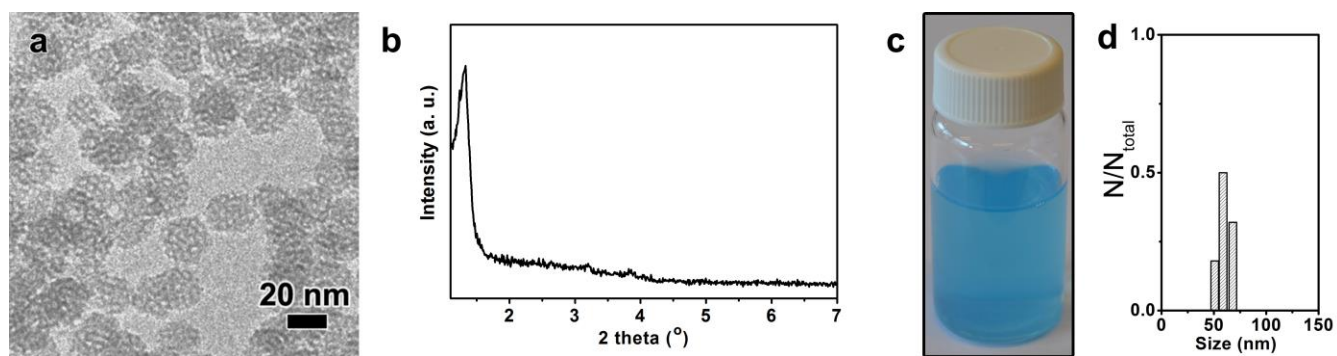

**Fig. S5.** TEM image (a), XRD pattern (b), photograph (c) and DLS (d) of MX-loaded UMSN.
